# Supplementary material
Source: PubMed Central journal article supplement (PMC1626613)
Supplement: plntcell_tpc.106.042226_2.pdf [file plntcell_tpc.106.042226_2.pdf]

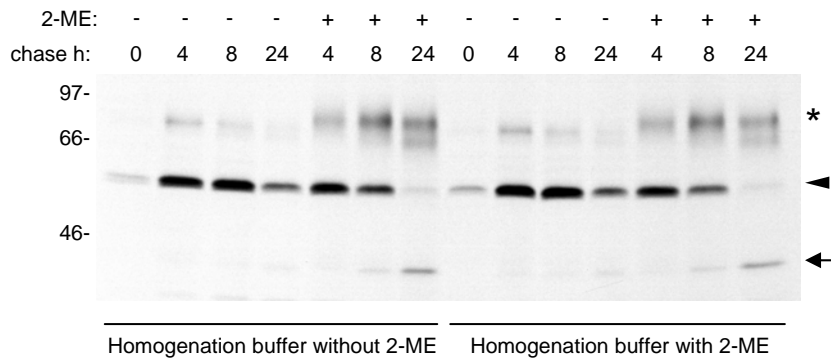

**Supplemental Figure 2.** The different forms of zeolin secreted by protoplasts are soluble.

Protoplasts from transgenic tobacco expressing zeolin were pulse-labeled with  $^{35}\text{S}$ -Met and  $^{35}\text{S}$ -Cys for 1 h and subjected to chase for the indicated times, in the presence (+) or absence (-) of 20 mM 2-ME. Total homogenates were prepared from incubation media, using homogenation buffer supplemented with 2-ME or without the reducing agent, and immunoselected with anti-phaseolin antiserum. Analysis was by SDS-PAGE and fluorography. The positions of zeolin (arrowhead), 45 kD form (arrow) and 95 kD putative O-glycosylated zeolin (asterisk) are indicated. Numbers at left indicate the positions of molecular mass markers in kD.
